# Supplementary material
Source: ML conference proceedings conference paper supplement (https://proceedings.mlr.press/v54/abeille17a.html)
Supplement: Supplementary file 1 [file abeille17a-supp.pdf]

## A Examples of TS distributions

*Example 1: Uniform distribution*  $\eta \sim \mathcal{U}_{B_d(0, \sqrt{d})}$ . The uniform distribution satisfies the concentration property with constants  $c = 1$  and  $c' = \frac{c}{d}$  by definition. Since the set  $\{\eta | u^\top \eta \geq 1\} \cap B_d(0, \sqrt{d})$  is an hyper-spherical cap for any direction  $u$  of  $\mathbb{R}^d$ , the the anti-concentration property is satisfied provided that the ratio between the volume of an hyper-spherical cap of height  $\sqrt{d} - 1$  and the volume of the ball of radius  $\sqrt{d}$  is constant (i.e., independent from  $d$ ). Using standard geometric results (see Prop. 9), one has that for any vector  $\|u\| = 1$

$$\mathbb{P}(u^\top \eta \geq 1) = \frac{1}{2} I_{1-\frac{1}{d}}\left(\frac{d+1}{2}, \frac{1}{2}\right), \quad (9)$$

where  $I_x(a, b)$  is the incomplete regularized beta function. In Prop. 10 we prove that

$$I_{1-\frac{1}{d}}\left(\frac{d+1}{2}, \frac{1}{2}\right) \geq \frac{1}{8\sqrt{6\pi}},$$

and hence we obtain  $p = \frac{1}{16\sqrt{6\pi}}$ .  $\square$

*Example 2: Gaussian case*  $\eta \sim \mathcal{N}(0, I_d)$ . The concentration property comes directly from the Chernoff bound for standard Gaussian random variable together with union bound argument. For any  $\alpha > 0$ , we have

$$\mathbb{P}(\|\eta\| \leq \alpha\sqrt{d}) \geq \mathbb{P}(\forall 1 \leq i \leq d, |\eta_i| \leq \alpha) \geq 1 - d\mathbb{P}(|\eta_i| \geq \alpha).$$

Standard concentration inequality for Gaussian random variable gives,  $\forall \alpha > 0$ ,

$$\mathbb{P}(|\eta_i| \geq \alpha) \leq 2e^{-\alpha^2/2}.$$

Plugging everything together with  $\alpha = \sqrt{2 \log \frac{2d}{\delta}}$  gives the desired result with  $c = c' = 2$ . Let  $\eta_i$  be the  $i$ -th component of  $\eta$  for any  $1 \leq i \leq d$ . Then  $\eta_i \sim \mathcal{N}(0, 1)$ . Since  $\eta$  is rotationally invariant, for any direction  $u$  of  $\mathbb{R}^d$  and an appropriate choice of basis, we have  $\mathbb{P}(u^\top \eta \geq 1) \geq \mathbb{P}(\eta_1 \geq 1)$ . From standard Gaussian properties (see Thm 2 of Chang et al. [2011]) we have

$$\mathbb{P}(\eta_1 \geq 1) = \frac{1}{2} \operatorname{erfc}\left(\frac{1}{\sqrt{2}}\right) \geq \frac{1}{4\sqrt{e\pi}}$$

which ensures the anti-concentration property with  $p = \frac{1}{4\sqrt{e\pi}}$ .  $\square$

## B Properties of convex function

**Proposition 4.** *Let  $f : \mathbb{R}^d \rightarrow \mathbb{R}$  be a convex function and  $C$  be a closed convex set of  $\mathbb{R}^d$ . Then, on  $C$ ,  $f$  reaches its maximum on the boundary of  $C$ .*

*Proof.* Let's denote as  $\operatorname{int}(C)$  and  $\operatorname{bound}(C)$  the interior and the boundary of the closed convex set  $C$  respectively. Assume that  $\exists x^* \in \operatorname{int}(C)$  such that  $f(x^*) > f(x)$  for any  $x \in \operatorname{bound}(C)$  and  $f(x^*) \geq f(y)$  for any  $y \in \operatorname{int}(C)$ .

Then define  $y = x^* + \epsilon(x^* - x)$  for some  $x \in \operatorname{bound}(C)$ . By definition of the open set  $\operatorname{int}(C)$ ,  $\exists \epsilon > 0$  such that  $y \in \operatorname{int}(C)$ . Moreover,  $x^* \in [y, x]$  e.g.

$$x^* = (1-t)x + ty, \quad t = \frac{1}{1+\epsilon} \in ]0, 1[$$

Using the convexity of  $f$  on has

$$\begin{aligned} f(x^*) &\leq (1-t)f(x) + tf(y) < (1-t)f(x^*) + tf(y) \\ f(x^*) &< f(y) \end{aligned}$$

which is impossible by assumption.  $\square$

**Proposition 5.** *Let  $f : \mathbb{R}^d \rightarrow \mathbb{R}$  be a convex function. Let  $B_d(0,1)$  be the unit  $d$ -dimensional ball and  $S_d(0,1)$  the associated unit sphere.*

*Given a point  $x \in S_d(0,1)$ , define as  $\mathcal{H}(x)$  the hyperplan tangent to  $B_d(0,1)$  at the point  $x$ .  $\mathcal{H}(x)$  split  $\mathbb{R}^d$  into two complementary subspace  $\mathcal{G}(x)$  and  $\mathcal{G}^\perp(x)$  where  $\mathcal{G}(x)$  does not contain the unit ball by convention.*

*Then for any  $x^* \in S_d(0,1)$  such that  $f(x^*) \geq f(x)$  for all  $x \in B_d(0,1)$ , one has*

$$\forall y \in \mathcal{G}(x^*), \quad f(y) \geq f(x^*)$$

*Proof.* We first notice that from Proposition 4  $x^*$  is well defined since the maximum is reached on the boundary. The associated subspace  $\mathcal{G}(x^*)$  is then

$$\mathcal{G}(x^*) := \{y = x^* + u, u \in \mathbb{R}^d \mid u^\top x^* \geq 0\}.$$

We want to show that  $f(y) \geq f(x^*)$  for any  $y \in \mathcal{G}(x^*)$ . We introduce the increasing sequence of subspace

$$\mathcal{G}_n = \left\{ y = x^* + u, u \in \mathbb{R}^d \mid u^\top x^* \geq \frac{\|u\|}{2(n-1)} \right\}, \quad n \geq 2.$$

For any  $y = x^* + u$  in  $\mathcal{G}_n$ , we associate

$$x = x^* - \frac{1}{2(n-1)} \frac{u}{\|u\|}.$$

By definition of  $y$  (and hence  $u$ ), we have

$$\begin{aligned} \|x\|^2 &= 1 + \frac{1}{2(n-1)}^2 - \frac{1}{2(n-1)\|u\|} u^\top x^* \\ &= 1 + \frac{1}{2(n-1)} \left[ \frac{1}{2(n-1)} - \frac{u^\top x^*}{\|u\|} \right] \\ &\leq 1, \end{aligned}$$

which means that  $x \in \mathcal{B}_d(0,1)$ . Moreover let  $t = [2(n-1)\|u\| + 1]^{-1}$ ,  $t \in ]0,1[$  one has  $x^* = (1-t)x + ty$ . Since  $x \in \mathcal{B}_d(0,1)$  then

$$\begin{aligned} f(x^*) &\leq (1-t)f(x) + tf(y) \\ &\leq (1-t)f(x^*) + tf(y) \\ &\Rightarrow f(x^*) \leq f(y). \end{aligned}$$

Since the statement of the proposition holds for any  $\mathcal{G}_n$ , then we obtain the desired result for  $\mathcal{G}$  by continuity of  $f$ . Let  $y \in \mathcal{G}(x^*)$ ,  $y = x^* + u$ . If  $u^\top x^* > 0$ , then  $\exists n \geq 2$  such that  $y \in \mathcal{G}_n$  and the proposition is satisfied. Otherwise, if  $u^\top x^* = 0$ , we introduce the sequences  $\{u_n\}$  and  $\{y_n\}$  defined as:

$$\begin{aligned} u_n &= u + \frac{\|u\|}{\sqrt{1 - \frac{1}{2(n-1)}^2}} \frac{x^*}{2(n-1)} \\ &= u + \frac{\|u_n\|}{2(n-1)} x^*, \\ y_n &= x^* + u_n. \end{aligned}$$

By construction,  $y_n \in \mathcal{G}_n$  and  $y_n \rightarrow y$  as  $n \rightarrow \infty$ . Since the  $f(y_n) \geq f(x^*)$  for any  $n \geq 2$  we obtain the desired result taking the limit since  $f$  is continuous as a convex function on  $\mathbb{R}^d$ .  $\square$

**Theorem 2** (A.D. Alexandrov). *Let  $f : \mathbb{R}^d \rightarrow \mathbb{R}$  be a convex function, then it is twice differentiable almost everywhere with respect to the Lebesgue's measure.*

*Proof.* This result is an extension of the Rademacher's theorem for convex functions. A proof can be found in Niculescu and Persson [2006], theorem 3.11.2.  $\square$

## C Properties of support function (proof of Proposition 3 and Lemma 2)

We study the *support function* of a set  $C$ , which is a function  $f_C : \mathbb{R}^d \rightarrow \mathbb{R}$  such that

$$f_C(\theta) = \sup_{x \in C} x^\top \theta \quad (10)$$

Those functions are at the core of convex geometry analysis.

**Proposition 6.** *Let  $C \subset \mathbb{R}^d$  be a non-empty compact set and  $f_C$  the associated support function. Then,*

1.  $f_C$  is real-valued and  $\sup_{x \in C} x^\top \theta$  is attained in  $C$ ,
2.  $f_C$  is convex,
3.  $f_C$  is continuous on  $\mathbb{R}^d$  and twice differentiable almost everywhere with respect to the Lebesgue's measure.

*Proof.* 1. This comes directly from the compactness of  $C$ : since  $C$  is bounded, the support function is real-valued and since  $C$  is closed, the supremum is attained in  $C$ ,

2. Let  $\theta_1, \theta_2$  two vectors of  $\mathbb{R}^d$ , and  $t \in (0, 1)$ . By definition of the supremum, since  $f_C$  is real-valued:

$$f_C(t\theta_1 + (1-t)\theta_2) = \sup_{x \in C} (tx^\top \theta_1 + (1-t)x^\top \theta_2) \leq t \sup_{x \in C} x^\top \theta_1 + (1-t) \sup_{x \in C} x^\top \theta_2$$

3. The continuity is consequence of the convexity of  $f_C$  on the open convex set  $\mathbb{R}^d$  and the second order differentiability comes from Alexandrov's theorem 2. □

**Proposition 7.** *Let  $x(\theta) \in \arg \sup_{x \in C} x^\top \theta$ , denote as  $\nabla f_C(\theta)$  and  $\partial f_C(\theta)$  the gradient (when it is uniquely defined) and the sub-gradient of  $f_C$  in  $\theta \in \mathbb{R}^d$ . Then,*

1. for all  $\theta \in \mathbb{R}^d$ ,  $x(\theta) \in \partial f_C(\theta)$ ,
2. there exists a null set  $\mathcal{N}$  with respect to the Lebesgue's measure such that  $x(\theta) = \nabla f_C(\theta)$  for all  $\theta \in \mathbb{R}^d \setminus \mathcal{N}$ ,
3. equivalently,  $x(\theta) = \nabla f_C(\theta)$  where the equality holds in the sense of the distribution.

*Proof.* Thanks to proposition 6, we know that the supremum is attained in  $x(\theta) \in C$ . Moreover, Alexandrov's theorem guarantee that  $\mathcal{N}$  is a null-set. Since the sub-gradient is reduced to a singleton where the function is differentiable e.g.  $\partial f_C(\theta) = \{\nabla f_C(\theta)\}$  for all  $\theta \in \mathbb{R}^d \setminus \mathcal{N}$ , one just need to show to  $x(\theta) \in \partial f_C(\theta)$  for all  $\theta \in \mathbb{R}^d$ . Since  $f_C(\theta) = \max_{x \in C} x^\top \theta$ , there exist at least one  $x(\theta) \in C$  for which the maximum is attained i.e.  $x(\theta)^\top \theta = f_C(\theta)$ . Moreover, for any  $\bar{\theta} \in \mathbb{R}^d$ ,  $f_C(\bar{\theta}) \geq x(\theta)^\top \bar{\theta}$  by definition. Therefore,

$$\begin{aligned} f_C(\bar{\theta}) - x(\theta)^\top \bar{\theta} &\geq 0 := f_C(\theta) - x(\theta)^\top \theta \\ f_C(\bar{\theta}) &\geq f_C(\theta) + x(\theta)^\top (\bar{\theta} - \theta), \quad \forall \bar{\theta} \in \mathbb{R}^d \end{aligned}$$

which is the definition of the sub-gradient. □

## D Regret Proofs

We collect here the main tools that we need to derive the proof. We first recall the Azuma's concentration inequality for super-martingale.

**Proposition 8.** *If a super-martingale  $(Y_t)_{t \geq 0}$  corresponding to a filtration  $\mathcal{F}_t$  satisfies  $|Y_t - Y_{t-1}| < c_t$  for some constant  $c_t$  for all  $t = 1, \dots, T$  then for any  $\alpha > 0$ ,*

$$\mathbb{P}(Y_T - Y_0 \geq \alpha) \leq 2e^{-\frac{\alpha^2}{2 \sum_{t=1}^T c_t^2}}$$

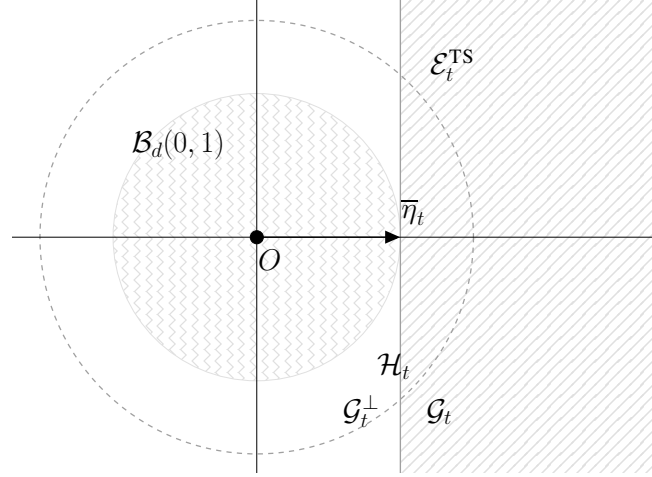

Figure 5: Illustration of the probability of selecting an optimistic  $\tilde{\theta}_t$ .

*Proof of Lemma 1.* We first bound the two events separately.

**Bounding  $\hat{E}$ .** This bound is a straightforward application of Proposition 1 together with a union bound argument. Let  $\delta' = \delta/(4T)$ , then

$$\begin{aligned}
 \forall 1 \leq t \leq T, \quad & \mathbb{P}\left(\|\hat{\theta}_t - \theta^*\|_{V_t} \leq \beta_t(\delta')\right) \geq 1 - \delta' \\
 \text{from union bound,} \quad & \mathbb{P}\left(\bigcap_{t=1}^T \left\{\|\hat{\theta}_t - \theta^*\|_{V_t} \leq \beta_t(\delta')\right\}\right) \geq 1 - \sum_{t=1}^T \mathbb{P}\left(\|\hat{\theta}_t - \theta^*\|_{V_t} \geq \beta_t(\delta')\right) \\
 \Rightarrow \quad & \mathbb{P}\left(\bigcap_{t=1}^T \left\{\|\hat{\theta}_t - \theta^*\|_{V_t} \leq \beta_t(\delta')\right\}\right) \geq 1 - \sum_{t=1}^T \delta' \\
 \Rightarrow \quad & \mathbb{P}(\hat{E}) \geq 1 - T\delta' = 1 - \frac{\delta}{4}.
 \end{aligned}$$

**Bounding  $\tilde{E}$ .** This bound comes directly from the concentration property of the TS sampling distribution. From the expression of  $\tilde{\theta}_t = \hat{\theta}_t + \beta_t(\delta')V_t^{-1/2}\eta_t$  where  $\eta_t$  is drawn i.i.d. from  $\mathcal{D}^{\text{TS}}$ , we have

$$\forall 1 \leq t \leq T, \quad \mathbb{P}\left(\|\tilde{\theta}_t - \hat{\theta}_t\|_{V_t} \leq \beta_t(\delta')\sqrt{cd \log \frac{c'd}{\delta'}}\right) = \mathbb{P}\left(\|\eta_t\| \leq \sqrt{cd \log \frac{c'd}{\delta'}}\right).$$

Then from Definition 1, we have

$$\mathbb{P}\left(\|\eta_t\| \leq \sqrt{cd \log \frac{c'd}{\delta'}}\right) \geq 1 - \delta'.$$

As before, a union bound over the two bounds ensures that

$$\mathbb{P}(\tilde{E}) \geq 1 - T\delta' = 1 - \frac{\delta}{4}.$$

Finally, a union bound argument between the two terms leads to

$$\mathbb{P}(\hat{E} \cap \tilde{E}) \geq 1 - \frac{\delta}{2}.$$

□

*Proof of Lemma 3.* We need to study the probability that a  $\tilde{\theta}$  drawn at time  $t$  from the TS sampling distribution is optimistic, i.e.,  $J(\tilde{\theta}) \geq J(\theta^*)$ , under event  $\widehat{E}_t$ . More formally let

$$p_t = \mathbb{P}(J(\tilde{\theta}) \geq J(\theta^*) | \mathcal{F}_t, \widehat{E}_t).$$

Using the definition of  $\widehat{E}_t$  we have that  $\theta^* \in \mathcal{E}_t^{\text{RLS}}$  (i.e., the true parameter vector belongs to the RLS ellipsoid) and then we can replace  $J(\theta^*)$  by the supremum over the ellipsoid as

$$p_t \geq \mathbb{P}\left(J(\tilde{\theta}) \geq \sup_{\theta \in \mathcal{E}_t^{\text{RLS}}} J(\theta) \middle| \mathcal{F}_t, \widehat{E}_t\right).$$

By recalling the definition of the TS sampling process, we can write  $\tilde{\theta} = \widehat{\theta}_t + \beta_t(\delta')V_t^{-1/2}\eta$ , where  $\eta \sim \mathcal{D}^{\text{TS}}$  and for notational convenience, we define the function  $f_t(\eta) = J(\widehat{\theta}_t + \beta_t(\delta')V_t^{-1/2}\eta)$ . Let  $\bar{\theta}_t = \arg \sup_{\theta \in \mathcal{E}_t^{\text{RLS}}} J(\theta)$  and  $\bar{\eta}_t$  be the corresponding  $\eta$  (i.e.,  $\bar{\eta}_t$  is such that  $\bar{\theta}_t = \widehat{\theta}_t + \beta_t(\delta')V_t^{-1/2}\bar{\eta}_t$ ). Since the supremum is taken within  $\mathcal{E}_t^{\text{RLS}}$ ,  $\bar{\eta}_t$  belongs to the unit ball (i.e.,  $\bar{\eta}_t \in \mathcal{B}_d(0, 1)$ ). As a result, we can rewrite the previous expression as

$$p_t \geq \mathbb{P}\left(f_t(\eta) \geq f_t(\bar{\eta}_t) \middle| \mathcal{F}_t, \widehat{E}_t\right).$$

Since the function  $f_t$  inherits all the properties of  $J$ , notably its convexity in  $\eta$ , we know that the supremum on a convex closed set is reached at least at one point  $\bar{\eta}_t$  and that it belongs to the boundary (see Prop. 4), which in our case corresponds to  $\|\bar{\eta}_t\| = 1$ . Moreover, let  $\mathcal{H}_t(\bar{\eta}_t)$  be the hyperplane tangent to  $\bar{\eta}_t$ .  $\mathcal{H}_t(\bar{\eta}_t)$  splits  $\mathbb{R}^d$  in two complementary subspaces  $\mathcal{G}_t$  and  $\mathcal{G}_t^\perp$  where  $\mathcal{G}_t$  does not contain the unit ball by convention. Again, the convexity of  $f_t$  ensures that  $f_t(\eta) \geq f_t(\bar{\eta}_t)$  for all  $\eta \in \mathcal{G}_t$  as proved in Prop. 5. As illustrated in Fig. 5 the probability of being optimistic is now reduced to the probability that  $\eta$  drawn from  $\mathcal{D}^{\text{TS}}$  falls into  $\mathcal{G}_t$ , which corresponds to

$$p_t \geq \mathbb{P}\left(\eta \in \mathcal{G}_t \middle| \mathcal{F}_t, \widehat{E}_t\right).$$

Let  $u_t$  be the vector defining the hyperspace  $\mathcal{H}_t(\bar{\eta}_t)$ , notice that the subspace  $u_t$  is entirely defined by the filtration  $\mathcal{F}_t$  and the event  $\widehat{E}_t$  and it is thus independent from  $\bar{\eta}_t$ . As a result, we obtain

$$p_t \geq \mathbb{P}\left(u_t^\top \eta \geq 1 \middle| \mathcal{F}_t, \widehat{E}_t\right) \geq p,$$

where the last step immediately follows from property 1 of Def. 1 of the TS sampling distribution.

Finally, we show that this property is not affected, up to a second order term, by the high-probability concentration event. It relies on the fact that the chosen confidence level  $\delta' = \delta/4T$  is small compared to the anti-concentration probability  $p$  of Def. 1. For sake of simplicity, we assume that  $T \geq 1/2p$  which implies that  $\delta' \leq p/2$ .

For any events  $A$  and  $B$ , one has

$$\mathbb{P}(A \cap B) = 1 - \mathbb{P}(A^c \cup B^c) \geq \mathbb{P}(A) - \mathbb{P}(B^c)$$

Applying the previous inequality to  $A := \{J(\tilde{\theta}) \geq J(\theta^*)\}$  and  $B := \{\tilde{\theta} \in \mathcal{E}_t^{\text{TS}}\}$  where  $\mathcal{E}_t^{\text{TS}} = \{\theta \in \mathbb{R}^d \mid \|\theta - \widehat{\theta}_t\|_{V_t} \leq \gamma_t(\delta')\}$  leads to

$$\mathbb{P}(\tilde{\theta}_t \in \Theta^{\text{opt}} \cap \mathcal{E}_t^{\text{TS}} | \mathcal{F}_t, \widehat{E}_t) \geq p - \delta' \geq p/2$$

□

*Proof of Theorem 1.* We first bound the two regret terms  $R^{\text{TS}}(T)$  and  $R^{\text{RLS}}(T)$ .

**Bound on  $R^{\text{TS}}(T)$ .** We collect the bounds on each term  $R_t^{\text{TS}}$  and obtain

$$R^{\text{TS}}(T) \leq \sum_{t=1}^T R_t^{\text{TS}} \mathbb{1}\{E_t\} \leq \frac{4\gamma_T(\delta')}{p} \sum_{t=1}^T \mathbb{E}[\|x^*(\tilde{\theta})\|_{V_t^{-1}} | \mathcal{F}_t]. \quad (11)$$

Since this term contains an expectation, we cannot directly apply Proposition 2 and we first need to rewrite to the total regret  $R^{\text{TS}}(T)$  as

$$R^{\text{TS}}(T) \leq \frac{4\gamma_T(\delta')}{p} \left( \sum_{t=1}^T \|x_t\|_{V_t^{-1}} + \underbrace{\sum_{t=1}^T \left( \mathbb{E}[\|x^*(\tilde{\theta})\|_{V_t^{-1}} | \mathcal{F}_t] - \|x_t\|_{V_t^{-1}} \right)}_{R_2^{\text{TS}}} \right). \quad (12)$$

From Prop. 2, the first term is bounded as,

$$\sum_{t=1}^T \|x_t\|_{V_t^{-1}} \leq \sqrt{T} \left( \sum_{t=1}^T \|x_t\|_{V_t^{-1}}^2 \right)^{1/2} \leq \sqrt{2Td \log \left( 1 + \frac{T}{\lambda} \right)}.$$

We now proceed applying Azuma inequality 8 to the second term which is a martingale by construction. Under assumption 1,  $\|x_t\| \leq 1$  for all  $t \geq 1$ , so since  $V_t^{-1} \leq \frac{1}{\lambda} I$  one gets,

$$\mathbb{E}[\|x^*(\tilde{\theta})\|_{V_t^{-1}} | \mathcal{F}_t] - \|x_t\|_{V_t^{-1}} \leq \frac{2}{\sqrt{\lambda}}, \quad a.s.$$

This provides an upper-bound on each element of  $R_2^{\text{TS}}$  which holds with probability at least  $1 - \frac{\delta}{2}$  as

$$R_2^{\text{TS}} \leq \sqrt{\frac{8T}{\lambda} \log \frac{4}{\delta}}.$$

**Bound on  $R^{\text{RLS}}(T)$ .** The bound on  $R^{\text{RLS}}$  is derived as previous results in [Abbasi-Yadkori et al., 2011b, Agrawal and Goyal, 2012b]. We decompose the term in a *sampling prediction error* and a *RLS prediction error* as follow

$$R^{\text{RLS}}(T) \leq \sum_{t=1}^T |x_t^\top (\tilde{\theta}_t - \hat{\theta}_t)| \mathbb{1}\{E_t\} + \sum_{t=1}^T |x_t^\top (\hat{\theta}_t - \theta^*)| \mathbb{1}\{E_t\}$$

By definition of the concentration event  $E_t$ ,

$$|x_t^\top (\tilde{\theta}_t - \hat{\theta}_t)| \mathbb{1}\{E_t\} \leq \|x_t\|_{V_t^{-1}} \gamma_t(\delta'), \quad |x_t^\top (\hat{\theta}_t - \theta^*)| \mathbb{1}\{E_t\} \leq \|x_t\|_{V_t^{-1}} \beta_t(\delta'),$$

so from proposition 2,

$$R^{\text{RLS}}(T) \leq (\beta_T(\delta') + \gamma_T(\delta')) \sqrt{2Td \log \left( 1 + \frac{T}{\lambda} \right)}. \quad (13)$$

**Final bound.** We finally plug everything together since from lemma 1 the concentration event holds with probability at least  $1 - \frac{\delta}{2}$ . Using the bound on  $R^{\text{TS}}(T)$  and a union bound argument one obtains the desired result which holds with probability at least  $1 - \delta$ .  $\square$

## E Hyperspherical cap and beta function

**Proposition 9.** Let  $V_d(R)$  be the volume of the  $d$ -dimensional ball of radius  $R$  and let  $V_d^{\text{cap}}(h)$  the volume of the hyperspherical cap of height  $h = R - r > 0$ . Then,

$$V_d^{\text{cap}}(h) = \frac{1}{2} V_d(R) I_{1 - (\frac{r}{R})^2} \left( \frac{d+1}{2}, \frac{1}{2} \right)$$

where  $I_x(a, b)$  is the incomplete regularized beta function.

*Proof.* The proof can be found in Li [2011].  $\square$

**Proposition 10.** Let  $I_x(a, b)$  is the incomplete regularized beta function,

$$\forall d \geq 2, \quad I_{1 - \frac{1}{d}} \left( \frac{d+1}{2}, \frac{1}{2} \right) \geq \frac{1}{8\sqrt{6\pi}}$$

*Proof.* The incomplete regularized beta function can be expressed in terms of the beta function  $B(a, b)$  and the incomplete beta function  $B_x(a, b)$  where

$$\begin{aligned} B_x(a, b) &= \int_0^x t^{a-1}(1-t)^{b-1} dt \\ B(a, b) &= B_1(a, b) \\ I_x(a, b) &= \frac{B_x(a, b)}{B(a, b)} \end{aligned}$$

Hence we seek for a lower bound on  $B_{1-\frac{1}{d}}\left(\frac{d+1}{2}, \frac{1}{2}\right)$  and an upper bound for  $B\left(\frac{d+1}{2}, \frac{1}{2}\right)$ .

1. Let first find an lower bound for the incomplete beta function. Since  $t \rightarrow t^{\frac{d-1}{2}}(1-t)^{-1/2}$  is positive and increasing on  $[0, 1]$ , for any  $d \geq 2$ ,

$$\begin{aligned} B_{1-\frac{1}{d}}\left(\frac{d+1}{2}, \frac{1}{2}\right) &\geq \int_{1-\frac{3}{2d}}^{1-\frac{1}{2d}} t^{\frac{d-1}{2}}(1-t)^{-1/2} dt \\ &\geq \frac{1}{2d} \left(\frac{3}{2d}\right)^{-1/2} \left(1 - \frac{3}{2d}\right)^{\frac{d-1}{2}} \\ &\geq \frac{1}{\sqrt{6d}} \left(1 - \frac{3}{2d}\right)^{\frac{d-1}{2}} \\ &\geq \frac{1}{\sqrt{6d}} \left(1 - \frac{3}{2d}\right)^{\frac{d}{2}} \end{aligned}$$

From the increasing property of  $x \rightarrow (1 - \frac{\alpha}{x})^x$  for any  $\alpha < 1$  the sequence  $\left\{\left(1 - \frac{3}{2d}\right)^{\frac{d}{2}}\right\}_{d \geq 2}$  is increasing and

$$B_{1-\frac{1}{d}}\left(\frac{d+1}{2}, \frac{1}{2}\right) \geq \frac{1}{\sqrt{6d}} \left(1 - \frac{3}{2 \times 2}\right)^{\frac{2}{2}} = \frac{1}{4\sqrt{6d}}$$

2. Now we seek for an upper bound for  $B\left(\frac{d+1}{2}, \frac{1}{2}\right)$ . Since  $B(a, b) = \frac{\Gamma(a)\Gamma(b)}{\Gamma(a+b)}$  one has:

$$B\left(\frac{d+1}{2}, \frac{1}{2}\right) = \frac{\Gamma\left(\frac{1}{2}\right)\Gamma\left(\frac{d+1}{2}\right)}{\Gamma\left(\frac{d}{2} + 1\right)} = \sqrt{\pi} \frac{\Gamma\left(\frac{d+1}{2}\right)}{\Gamma\left(\frac{d}{2} + 1\right)}$$

From Chen and Qi [2005] we have the following inequalities for the gamma function  $\forall n \geq 1$ :

$$\begin{aligned} \frac{\Gamma(n+1/2)}{\Gamma(n+1)} &\leq (n+1/4)^{-1/2} \\ \frac{\Gamma(n+1/2)}{\Gamma(n+1)} &\geq (n+4/\pi-1)^{-1/2} \end{aligned}$$

Together with  $\Gamma(x+1) = x\Gamma(x)$  and treating separately cases where  $d$  is even or not, one gets  $\forall d \geq 2$

$$\frac{\Gamma\left(\frac{d+1}{2}\right)}{\Gamma\left(\frac{d}{2} + 1\right)} \leq \frac{2}{\sqrt{d}}$$

3. Using the obtained upper and lower bound we get:

$$I_{1-\frac{1}{d}}\left(\frac{d+1}{2}, \frac{1}{2}\right) \geq \frac{\sqrt{d}}{2\sqrt{\pi} \times 4\sqrt{6d}} \geq \frac{1}{8\sqrt{6\pi}}$$

□

## F Generalized Linear Bandit

We present here how to apply our derivation to the generalized linear bandit (GLM) problem of Filippi et al. [2010]. The regret bound is obtained by basically showing that the GLM problem can be reduced to studying the linear case.

**The setting.** Let  $\mathcal{X} \subset \mathbb{R}^d$  be an arbitrary (finite or infinite) set of arms. Every time an arm  $x \in \mathcal{X}$  is pulled, a reward is generated as  $r(x) = \mu(x^\top \theta^*) + \xi$ , where  $\mu$  is the so-called *link function*,  $\theta^* \in \mathbb{R}^d$  is a fixed but unknown parameter vector and  $\xi$  is a random zero-mean noise. The value of an arm  $x \in \mathcal{X}$  is evaluated according to its expected reward  $\mu(x^\top \theta^*)$  and for any parameter  $\theta \in \mathbb{R}^d$  we denote the optimal arm and its optimal value as

$$x^*(\theta) = \arg \max_{x \in \mathcal{X}} \mu(x^\top \theta), \quad J^{\text{GLM}}(\theta) = \sup_{x \in \mathcal{X}} \mu(x^\top \theta). \quad (14)$$

Then  $x^* = x^*(\theta^*)$  is the optimal arm associated with the true parameter  $\theta^*$  and  $J^{\text{GLM}}(\theta^*)$  its optimal value. At each step  $t$ , a learner chooses an arm  $x_t \in \mathcal{X}$  using all the information observed so far (i.e., sequence of arms and rewards) but without knowing  $\theta^*$  and  $x^*$ . At step  $t$ , the learner suffers an *instantaneous regret* corresponding to the difference between the expected rewards of the optimal arm  $x^*$  and the arm  $x_t$  played at time  $t$ . The objective of the learner is to minimize the *cumulative regret* up to a finite step  $T$ ,

$$R^{\text{GLM}}(T) = \sum_{t=1}^T (\mu(x^{*\top} \theta^*) - \mu(x_t^\top \theta^*)). \quad (15)$$

**Assumptions.** The assumptions associated with this more general problem are the same as in the linear bandit problem plus one regarding the link function. Formally, we require assumption 1, 2 and 3 and add:

**Assumption 4** (link function). *The link function  $\mu : \mathbb{R} \rightarrow \mathbb{R}$  is continuously differentiable, Lipschitz with constant  $k_\mu$  and such that  $c_\mu = \inf_{\theta \in \mathbb{R}^d, x \in \mathcal{X}} \mu(x^\top \theta) > 0$ .*

**Technical tools.** Let  $(x_1, \dots, x_t) \in \mathcal{X}^t$  be a sequence of arms and  $(r_2, \dots, r_{t+1})$  be the corresponding observed (random) rewards, then the unknown parameter  $\theta^*$  can be estimated by GLM estimator. Following Filippi et al. [2010] one gets, for any regularization parameter  $\lambda \in \mathbb{R}^+$ ,

$$\hat{\theta}_t^{\text{GLM}} = \arg \min_{\theta \in \mathbb{R}^d} \left\| \sum_{s=1}^{t-1} (r_{s+1} - \mu(x_s^\top \theta)) x_s \right\|_{V_t^{-1}}^2, \quad (16)$$

where  $V_t$  is the same design matrix as in the linear case. Similar to Prop. 1, we have a concentration inequality for the GLM estimate.

**Proposition 11** (Prop. 1 in appendix.A in Filippi et al. [2010]). *For any  $\delta \in (0, 1)$ , under assumptions 1, 2, 3 and 4, for any  $\mathcal{F}_t^x$ -adapted sequence  $(x_1, \dots, x_t, \dots)$ , the prediction returned by the GLM estimator  $\hat{\theta}_t^{\text{GLM}}$  (Eq. 16) is such that for any fixed  $t \geq 1$ ,*

$$\|\hat{\theta}_t^{\text{GLM}} - \theta^*\|_{V_t} \leq \frac{\beta_t(\delta)}{c_\mu}, \quad (17)$$

and

$$\begin{aligned} \forall x \in \mathbb{R}^d, \quad \|\mu(x^\top \hat{\theta}_t^{\text{GLM}}) - \mu(x^\top \theta^*)\| &\leq \frac{k_\mu \beta_t(\delta)}{c_\mu} \|x\|_{V_t^{-1}}, \\ \|x^\top \hat{\theta}_t^{\text{GLM}} - x^\top \theta^*\| &\leq \frac{\beta_t(\delta)}{c_\mu} \|x\|_{V_t^{-1}}, \end{aligned} \quad (18)$$

with probability  $1 - \delta$  (w.r.t. the noise sequence  $\{\xi_t\}_t$  and any other source of randomization in the definition of the sequence of arms), where  $\beta_t(\delta)$  is defined as in Eq. 5.

The Asm. 4 on the link function together with the properties of the GLM estimator implies the following:

1. since the first derivative is strictly positive,  $\mu$  is strictly increasing and  $x^*(\theta) = \arg \max_{x \in \mathcal{X}} x^\top \theta$  so we retrieve the optimal arm of the linear case (and the support function),



2. the concentration inequality of the GLM estimate involves the same ellipsoid as for the RLS (multiplied by a factor  $\frac{1}{c_\mu}$ ).

These two facts suggest to use then exactly the same TS algorithm as for the linear case (with a  $\beta$  multiplied by a factor  $\frac{1}{c_\mu}$ ).

**Sketch of the proof.** From the previous comments, making use of the property of  $\mu$ , one just need to reduce the GLM case to the standard linear case.

$$\begin{aligned} R^{\text{GLM}}(T) &= \sum_{t=1}^T (\mu(x^* \theta^*) - \mu(x_t^\top \theta^*)), \\ &= \sum_{t=1}^T (\mu(x^* \theta^*) - \mu(x_t^\top \tilde{\theta}_t)) + \sum_{t=1}^T (\mu(x_t^\top \tilde{\theta}_t) - \mu(x_t^\top \theta^*)) \\ &\leq \sum_{t=1}^T (\mu(x^* \theta^*) - \mu(x_t^\top \tilde{\theta}_t)) + \sum_{t=1}^T k_\mu \|x_t\|_{V_t^{-1}} \|\tilde{\theta}_t - \theta^*\|_{V_t}. \end{aligned}$$

The second term is bounded exactly as  $R^{\text{RLS}}(T)$ . To bound the first one, we make use of the fact that

$$\begin{aligned} \mu(x^* \theta^*) - \mu(x_t^\top \tilde{\theta}_t) &\leq k_\mu (J(\theta^*) - J(\tilde{\theta}_t)), \quad \text{if } J(\theta^*) - J(\tilde{\theta}_t) \geq 0, \\ \mu(x^* \theta^*) - \mu(x_t^\top \tilde{\theta}_t) &\leq c_\mu (J(\theta^*) - J(\tilde{\theta}_t)), \quad \text{otherwise.} \end{aligned}$$

Following the proof of the linear case, with high probability, for all  $t \geq 1$ ,

$$J(\theta^*) - J(\tilde{\theta}_t) \leq \frac{2\gamma_t(\delta')}{c_\mu p} \mathbb{E}(\|x_t\|_{V_t^{-1}} | \mathcal{F}_t).$$

Since the r.h.s is strictly positive one can bound the first part of the regret, independently of the sign by,

$$\sum_{t=1}^T (\mu(x^* \theta^*) - \mu(x_t^\top \tilde{\theta}_t)) \leq \frac{2k_\mu \gamma_T(\delta')}{c_\mu p} \sum_{t=1}^T \mathbb{E}(\|x_t\|_{V_t^{-1}} | \mathcal{F}_t).$$

Finally, the same proof as in the linear case leads to the following bound for the Generalized Linear Bandit regret.

**Lemma 4.** *Under assumptions 1,2,3 and 4, the cumulative regret of TS over  $T$  steps is bounded as*

$$R^{\text{GLM}}(T) \leq \frac{k_\mu}{c_\mu} (\beta_T(\delta') + \gamma_T(\delta')(1 + 2/p)) \sqrt{2Td \log(1 + \frac{T}{\lambda})} + \frac{2k_\mu \gamma_T(\delta')}{pc_\mu} \sqrt{\frac{8T}{\lambda} \log \frac{4}{\delta}} \quad (19)$$

with probability  $1 - \delta$  where  $\delta' = \frac{\delta}{4T}$ .

## G Regularized Linear Optimization

We consider here the Regularized Linear Optimization (RLO) problem as an extension of the Linear Bandit problem. Given a set of arms  $\mathcal{X} \subset \mathbb{R}^d$  and an unknown parameter  $\theta^* \in \mathbb{R}^d$ , a learner aims at each time step  $t = 1, \dots, T$  to select action  $x_t \in \mathcal{X}$  which maximizes its associated reward  $x_t^\top \theta^* + \mu c(x_t)$  where  $\mu$  is a known constant and  $c$  an arbitrary (yet known) real-valued function. Whenever arm  $x$  is pulled, the learner receives a noisy observation  $y = x^\top \theta^* + \xi$ . As for LB, we introduce the function  $f(x; \theta) = x^\top \theta + \mu c(x)$ , and denote as  $x^*(\theta) = \arg \max_{x \in \mathcal{X}} f(x; \theta)$  and  $J(\theta) = \max_{x \in \mathcal{X}} f(x; \theta)$  the optimal action and optimal reward associated with  $\theta$ . The regret is therefore defined as  $R^{\text{RLO}}(T) = \sum_{t=1}^T f(x^*(\theta^*); \theta^*) - f(x_t; \theta^*)$ .

Since this problem is just the regularized extension of the Linear Bandit, the TS algorithm is similar to Alg. 1 where  $r_t$  is replaced  $y_t$  and  $x_t = \arg \max_{x \in \mathcal{X}} f(x, \tilde{\theta}_t)$ . Under the same assumptions, the regret shares the same bound and our line of proof holds. First, we decompose the regret

$$R(T) = \sum_{t=1}^T [(f(x^*(\theta^*); \theta^*) - f(x_t; \tilde{\theta}_t)) + (f(x_t; \tilde{\theta}_t) - f(x_t; \theta^*))] = \underbrace{\sum_{t=1}^T [J(\theta^*) - J(\tilde{\theta}_t)]}_{=R^{\text{TS}}(T)} + \underbrace{\sum_{t=1}^T [x_t^\top \tilde{\theta}_t - x_t^\top \theta^*]}_{=R^{\text{RLS}}(T)}.$$

Since Prop. 1 holds thanks to the linear observations  $y_t$ ,  $R^{\text{RLS}}(T)$  is bounded as in the LB. Finally, to bound  $R^{\text{TS}}(T)$ , one just need to ensure that Prop. 3, Lem. 2 and Lem. 3 hold.

The convexity of the function  $f$  with respect to  $\theta$  implies the convexity of  $J$ :  $\forall x \in \mathcal{X}, \forall \theta, \theta' \in \mathbb{R}^d, \forall \alpha \in (0, 1)$ ,

$$J(\alpha\theta + (1 - \alpha)\theta') = \max_{x \in \mathcal{X}} f(x; \alpha\theta + (1 - \alpha)\theta') \leq \max_{x \in \mathcal{X}} (\alpha f(x; \theta) + (1 - \alpha)f(x; \theta')) \leq \alpha J(\theta) + (1 - \alpha)J(\theta').$$

Then,  $J$  is real-valued and convex which implies its continuous differentiability thanks to Alexandrov's theorem. As a consequence, the first step of the proof holds.

The equality between the gradient  $\nabla J(\theta)$  and the optimal arm  $x^*(\theta)$  can be derived as in Prop. 7: for any  $\theta, \bar{\theta} \in \mathbb{R}^d$ , by definition,  $J(\theta) = f(x^*(\theta); \theta)$  and  $J(\bar{\theta}) \geq f(x^*(\theta); \bar{\theta})$ . Then,

$$\begin{aligned} J(\bar{\theta}) - f(x^*(\theta), \bar{\theta}) &\geq 0 := J(\theta) - f(x^*(\theta), \theta), \\ J(\bar{\theta}) &\geq J(\theta) + f(x^*(\theta), \bar{\theta}) - f(x^*(\theta), \theta) = J(\theta) + x^*(\theta)^\top (\bar{\theta} - \theta), \quad \forall \bar{\theta} \in \mathbb{R}^d, \end{aligned}$$

which is the definition of the sub-gradient. Finally, the almost everywhere differentiability of  $J$  ensures the sub-gradient to be a singleton and hence equals the gradient. Therefore, Lem. 2 holds and so is step 2.

Finally, since the optimism just relies on the convexity of  $J$  and on the over-sampling, it is satisfied in the RLO and step 3 holds. As a result, we obtain the same regret bound as in the LB.
